# Supplementary material
Source: publisher site journal article supplement (https://studysites.uk.sagepub.com/gribben/Web%20Material%20(Appendix)/Gribben_Web%20Material%20(Appendix)_Ch-04.pdf)
Supplement: Supplementary file 1 [file Gribben_Web%20Material%20(Appendix)_Ch-04.pdf]

# Appendix 4: Key asking words dictionary – Version 1

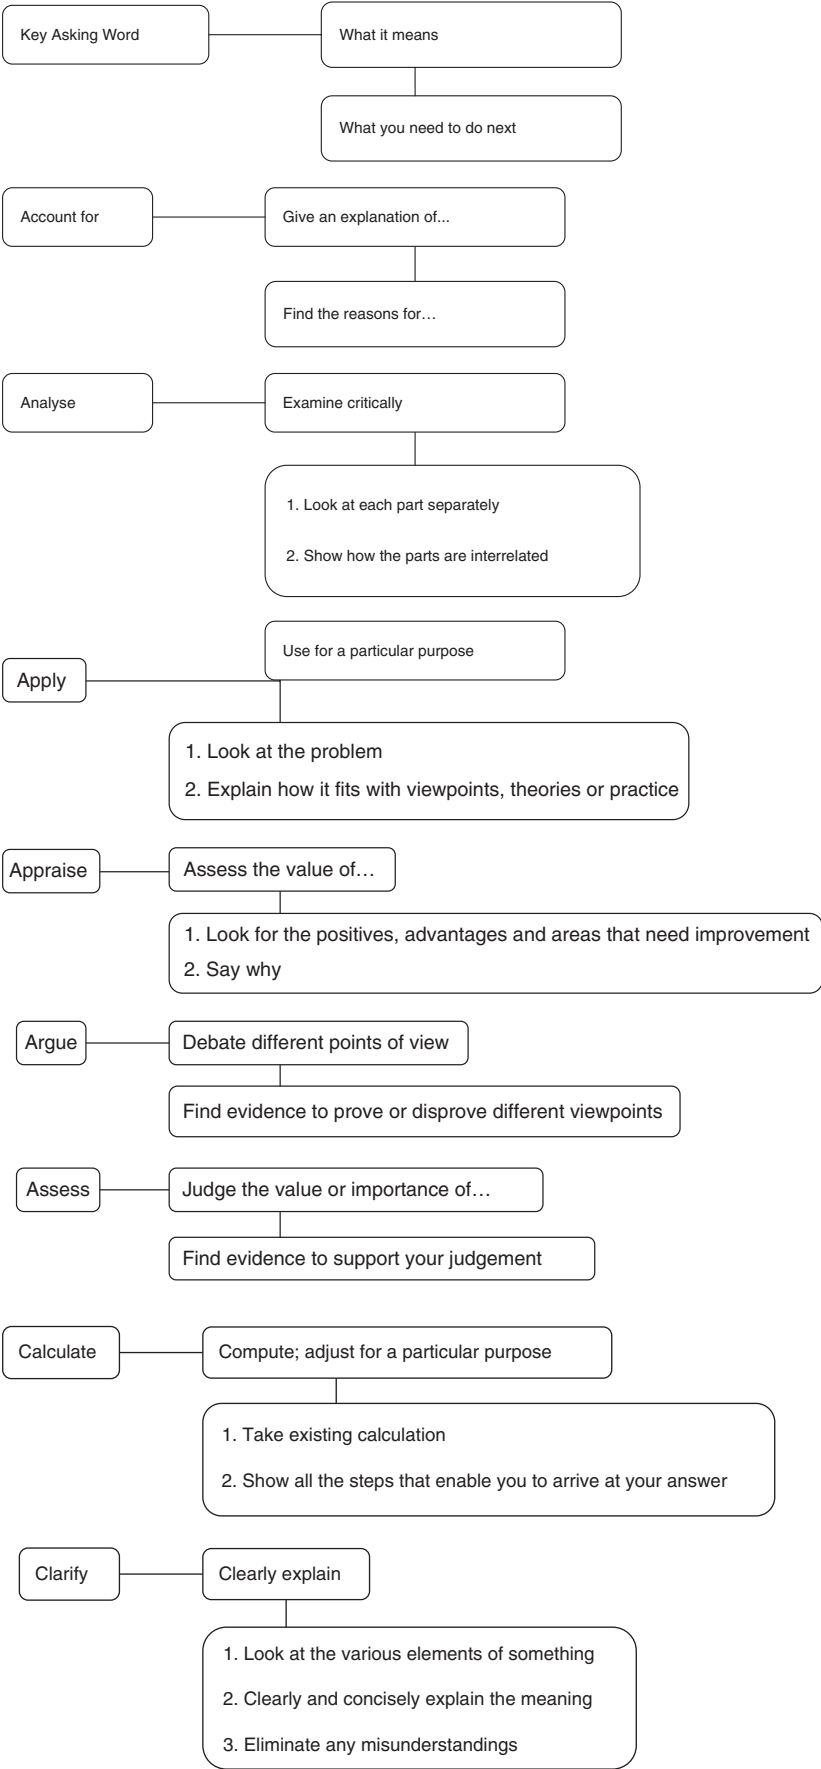

Key Asking Word

What it means

What you need to do next

Account for

Give an explanation of...

Find the reasons for...

Analyse

Examine critically

1. Look at each part separately

2. Show how the parts are interrelated

Apply

Use for a particular purpose

1. Look at the problem

2. Explain how it fits with viewpoints, theories or practice

Appraise

Assess the value of...

1. Look for the positives, advantages and areas that need improvement

2. Say why

Argue

Debate different points of view

Find evidence to prove or disprove different viewpoints

Assess

Judge the value or importance of...

Find evidence to support your judgement

Calculate

Compute; adjust for a particular purpose

1. Take existing calculation

2. Show all the steps that enable you to arrive at your answer

Clarify

Clearly explain

1. Look at the various elements of something

2. Clearly and concisely explain the meaning

3. Eliminate any misunderstandings

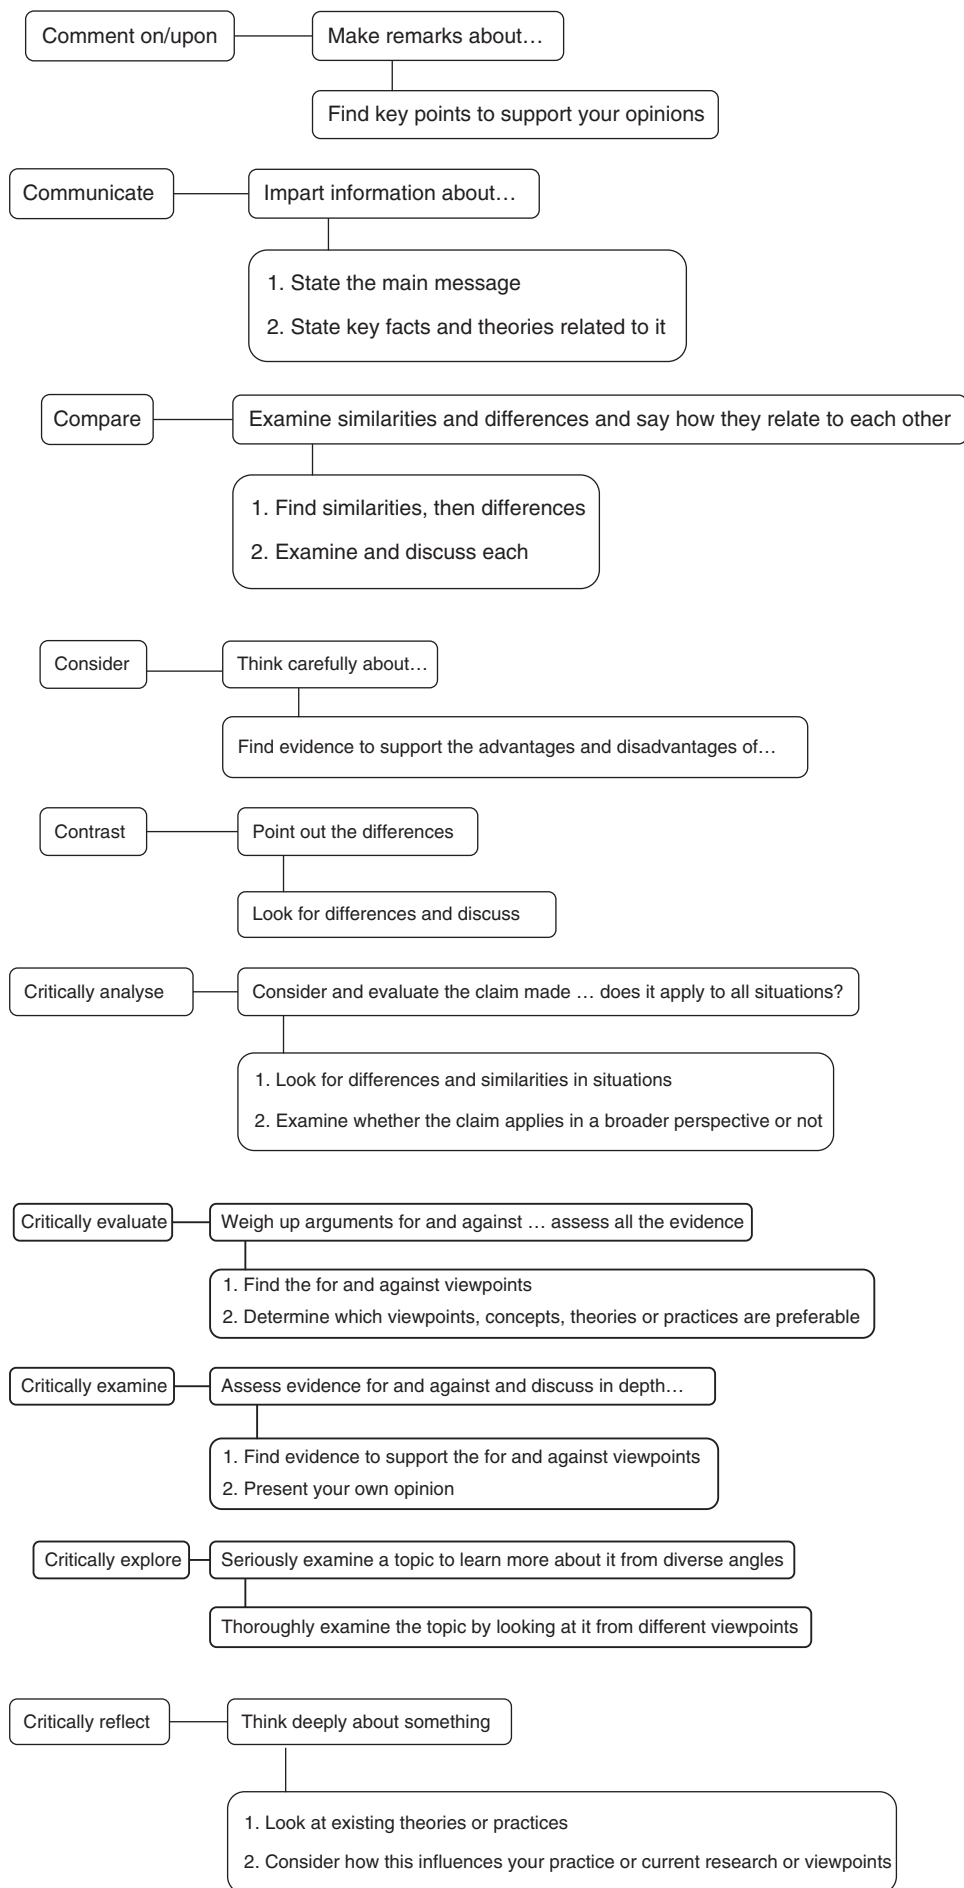

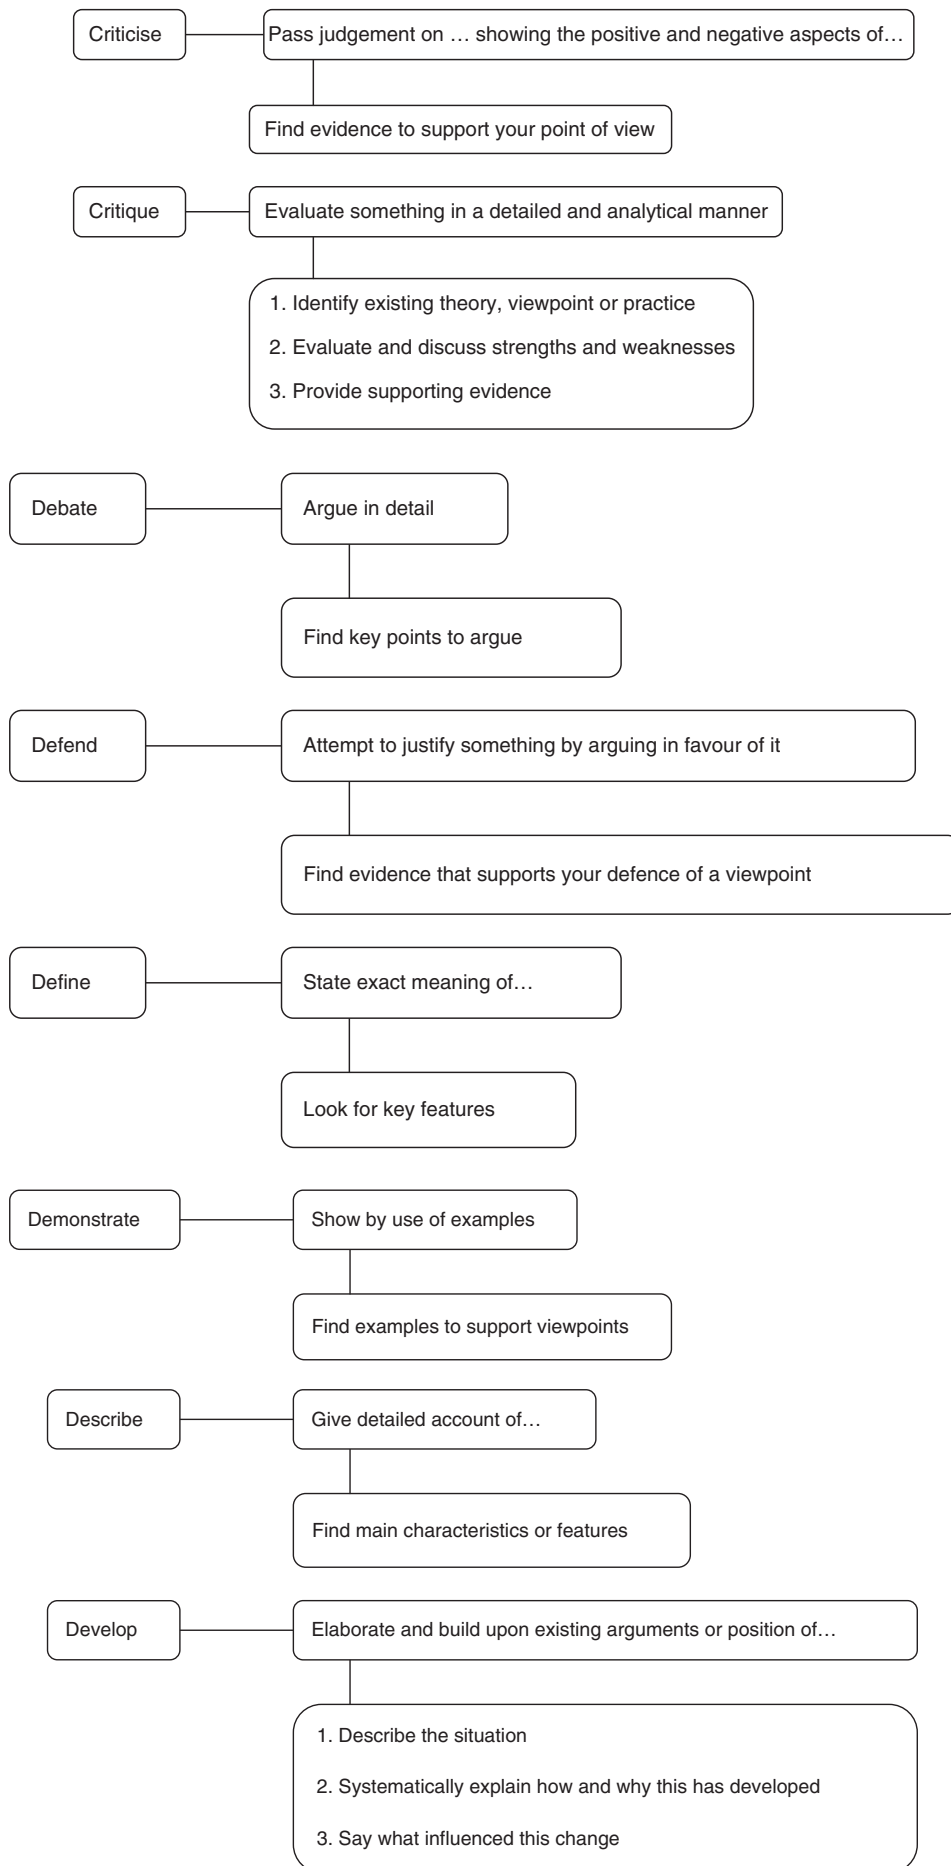

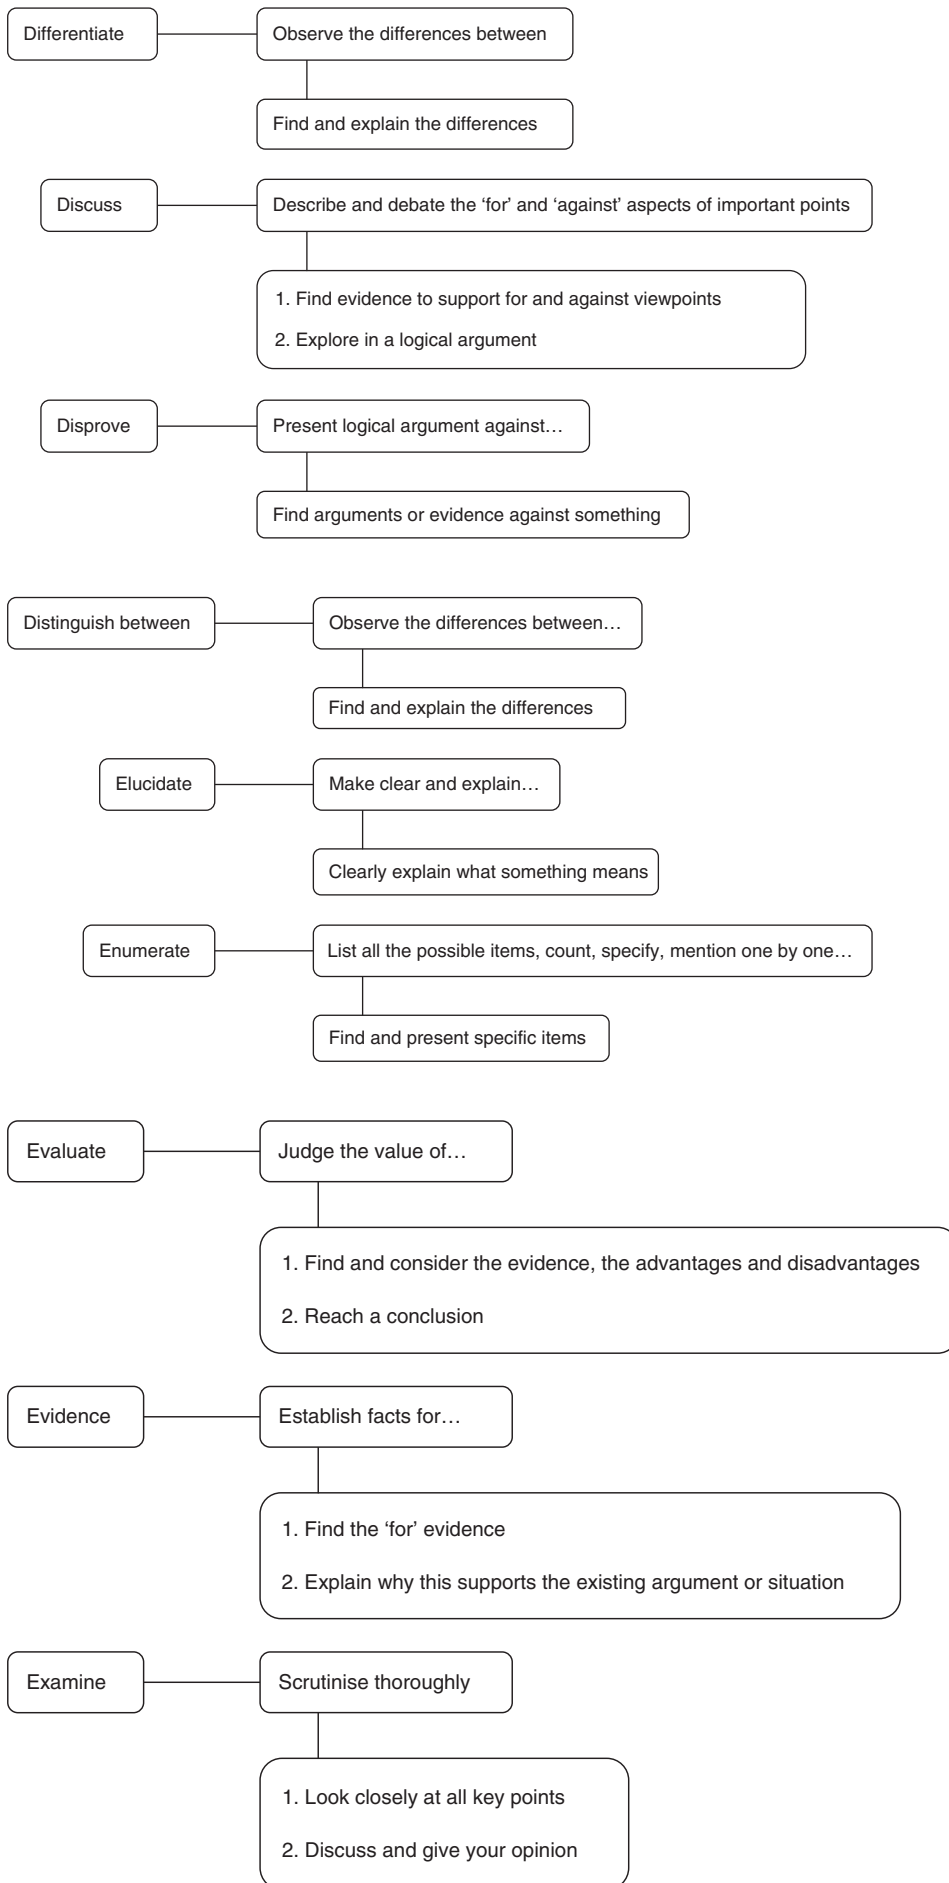

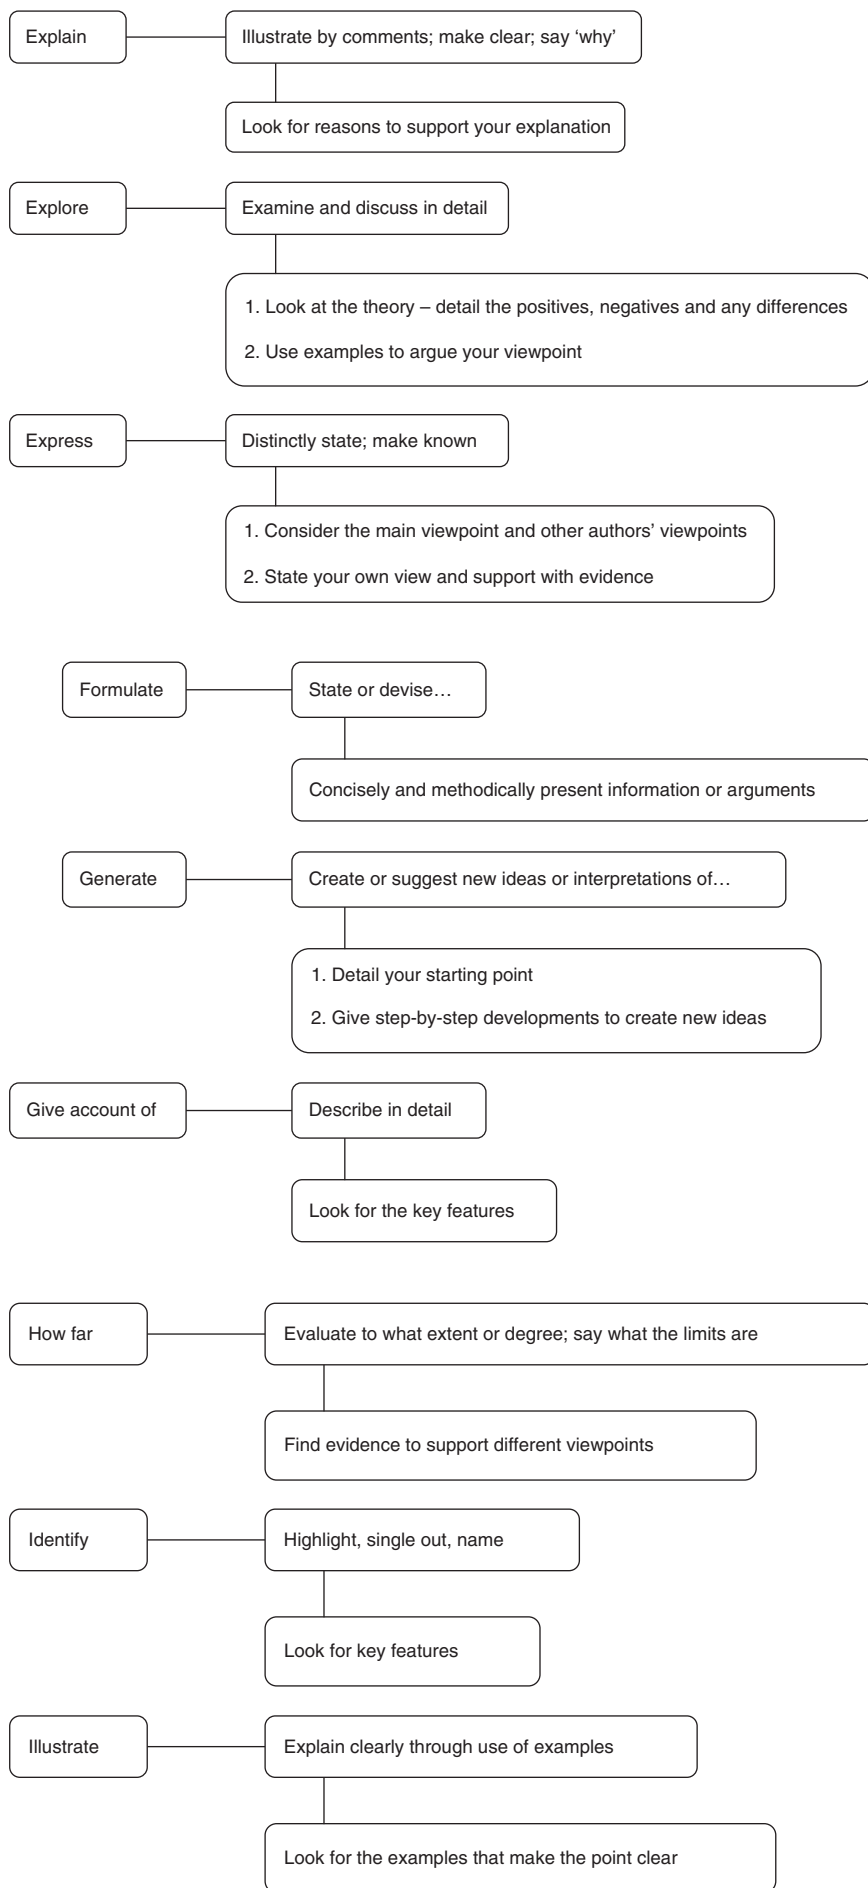

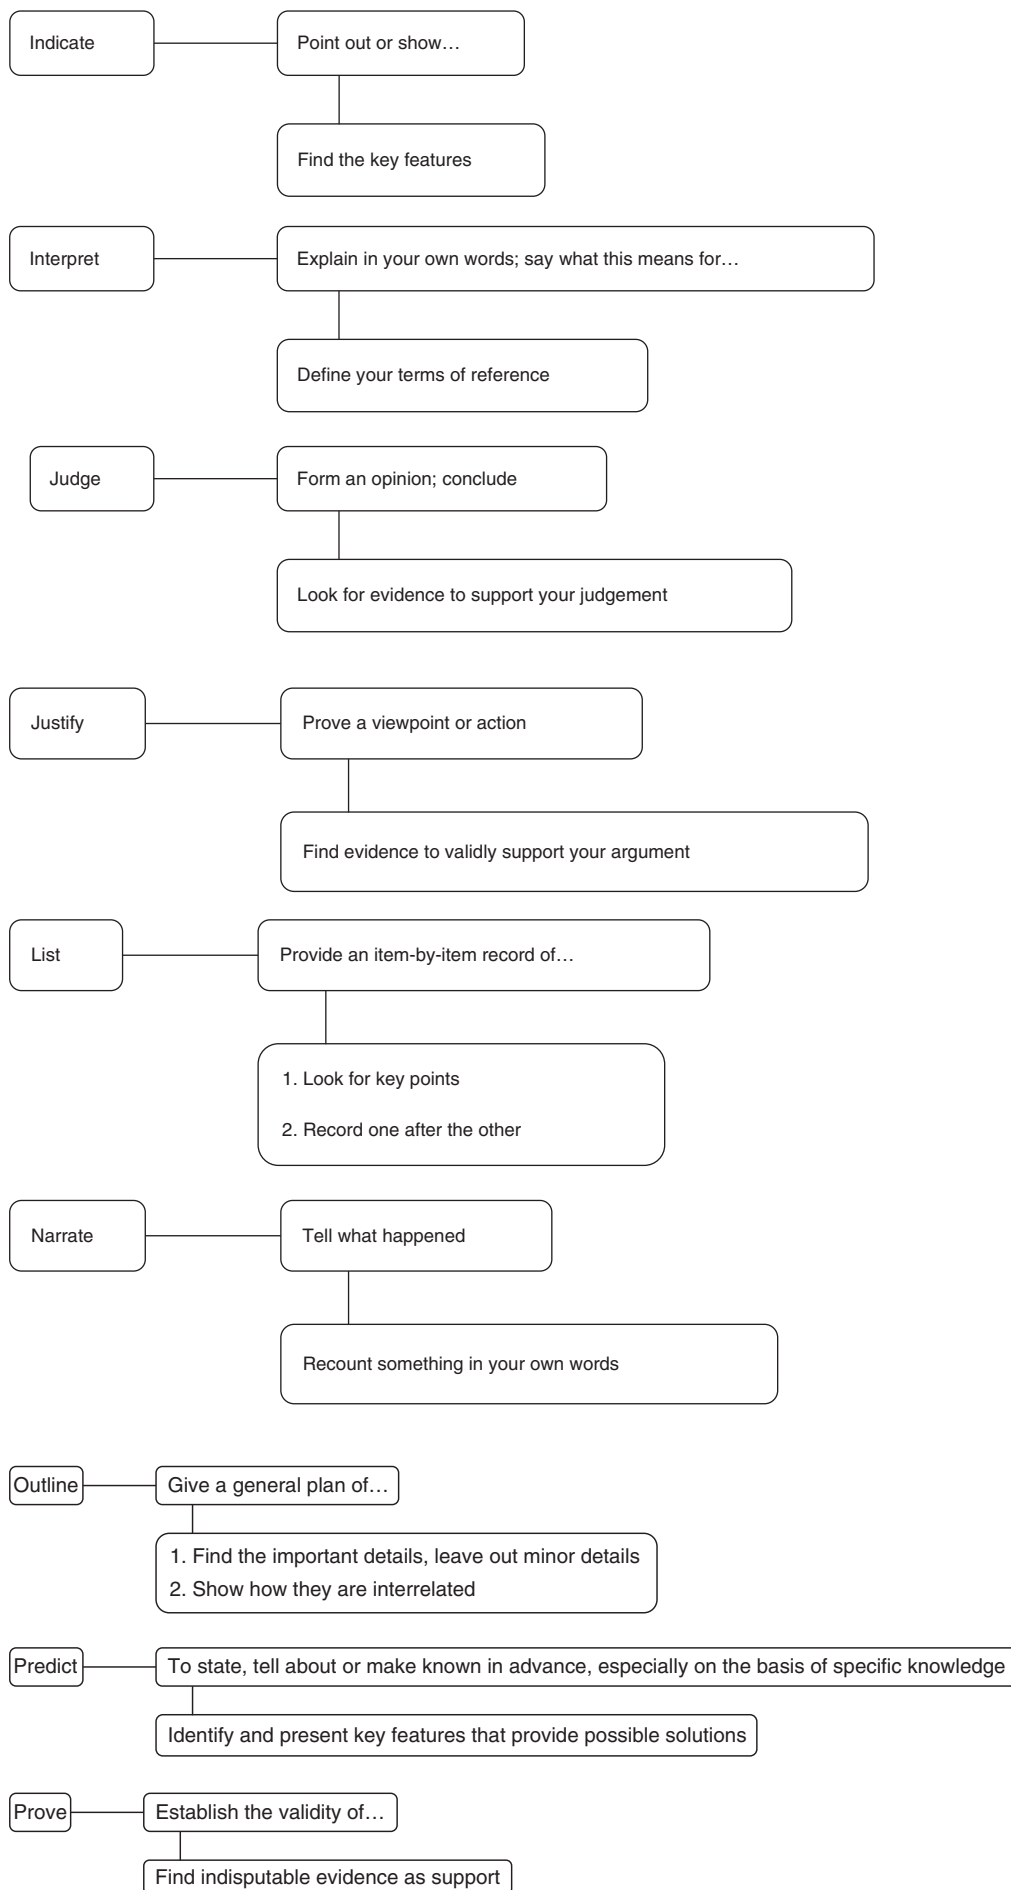

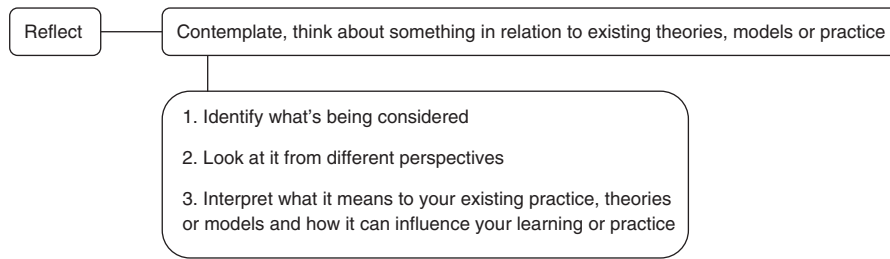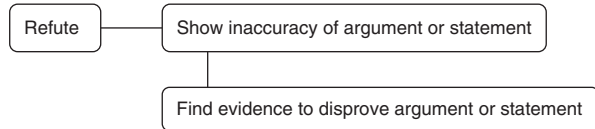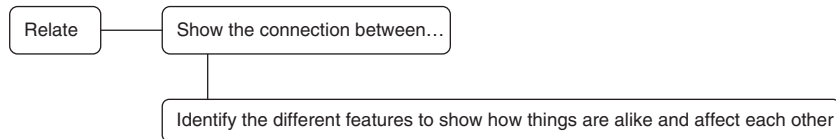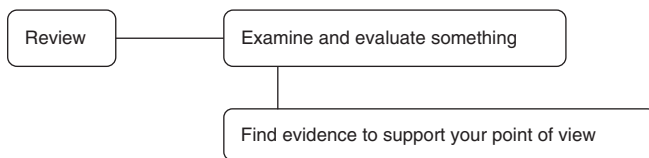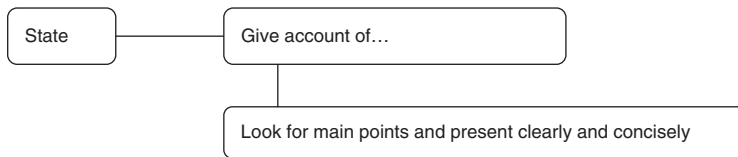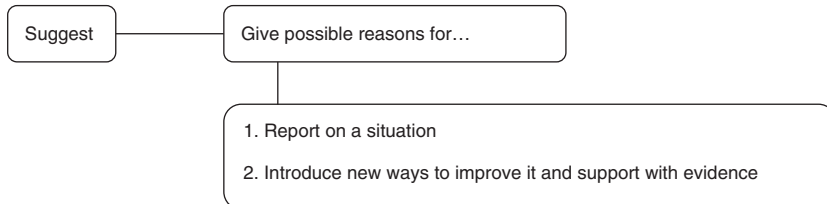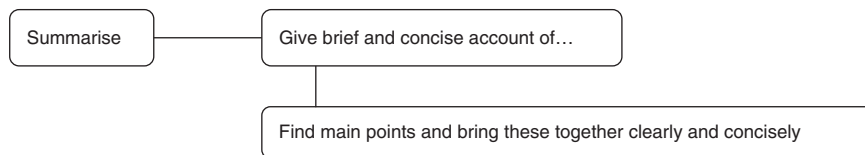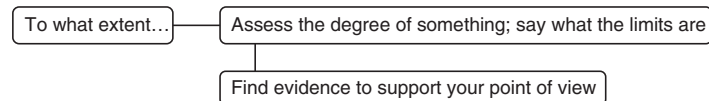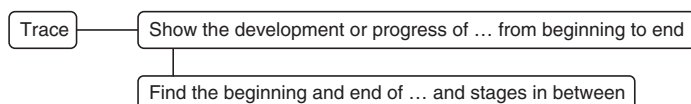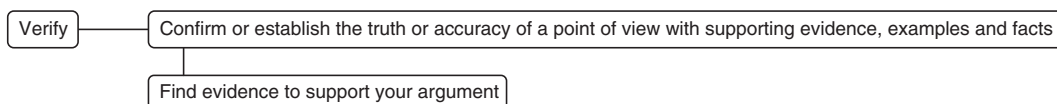

## Appendix 4: Key Asking Words Dictionary – Version 2

| Key Asking Words    | What it means                                                              | What you need to do next                                                                                                  |
|---------------------|----------------------------------------------------------------------------|---------------------------------------------------------------------------------------------------------------------------|
| Account for         | Give an explanation of...                                                  | Find the reasons for...                                                                                                   |
| Analyse             | Examine critically                                                         | Look at each part separately; show how the parts are interrelated                                                         |
| Apply               | Use for a particular purpose                                               | Look at the problem; explain how it fits with viewpoints, theories or practice                                            |
| Appraise            | Assess the value of...                                                     | Look for the positives, advantages and areas that need improvement, and say why                                           |
| Argue               | Debate different points of view                                            | Find evidence to prove or disprove different viewpoints                                                                   |
| Assess              | Judge the value or importance of...                                        | Find evidence to support your judgement                                                                                   |
| Calculate           | Compute; adjust for a particular purpose                                   | Take an existing calculation, and show all the steps that enable you to arrive at your answer                             |
| Clarify             | Clearly explain...                                                         | Look at the various elements of something and clearly and concisely explain the meaning. Eliminate any misunderstandings  |
| Comment on/upon     | Make remarks about...                                                      | Find key points to support your opinions                                                                                  |
| Communicate         | Impart information about...                                                | State the main message and key facts and theories related to it                                                           |
| Compare             | Examine similarities and differences and say how they relate to each other | Find similarities, then differences, examine and discuss                                                                  |
| Consider            | Think carefully about...                                                   | Find evidence to support the advantages and disadvantages of...                                                           |
| Contrast            | Point out the differences                                                  | Look for differences and discuss                                                                                          |
| Critically analyse  | Consider and evaluate the claim made ... does it apply to all situations?  | Look for differences and similarities in situations and examine whether the claim applies in a broader perspective or not |
| Critically evaluate | Weigh up arguments for and against ... assess all the evidence             | Find the for and against viewpoints and determine which viewpoints, concepts, theories or practices are preferable        |
| Critically examine  | Assess evidence for and against and discuss in depth...                    | Find evidence to support the for and against viewpoints and then present your own opinion                                 |
| Critically explore  | Seriously examine a topic to learn more about it from diverse angles       | Thoroughly examine the topic by looking at it from different viewpoints                                                   |



| <b>Key Asking Words</b> | <b>What it means</b>                                                    | <b>What you need to do next</b>                                                                                                |
|-------------------------|-------------------------------------------------------------------------|--------------------------------------------------------------------------------------------------------------------------------|
| Critically reflect      | Think deeply about something                                            | Look at existing theories or practices and consider how this influences your practice or current research or viewpoints        |
| Criticise               | Pass judgement on ... showing the positive and negative aspects of...   | Find evidence to support your point of view                                                                                    |
| Critique                | Evaluate something in a detailed and analytical manner                  | Identify existing theory, viewpoint or practice, evaluate and discuss strengths and weaknesses and provide supporting evidence |
| Debate                  | Argue in detail                                                         | Find key points to argue                                                                                                       |
| Defend                  | Attempt to justify something by arguing in favour of it                 | Find evidence that supports your defence of a viewpoint                                                                        |
| Define                  | State exact meaning of...                                               | Look for key features                                                                                                          |
| Demonstrate             | Show by use of examples                                                 | Find examples to support viewpoints                                                                                            |
| Describe                | Give detailed account of...                                             | Find main characteristics or features                                                                                          |
| Develop                 | Elaborate and build upon existing arguments or position of...           | Describe the situation then systematically explain how and why this has developed and what influenced this change              |
| Differentiate           | Observe the differences between                                         | Find and explain the differences                                                                                               |
| Discuss                 | Describe and debate the 'for' and 'against' aspects of important points | Find evidence to support for and against viewpoints and explore in a logical argument                                          |
| Disprove                | Present a logical argument against...                                   | Find arguments or evidence against something                                                                                   |
| Distinguish between     | Observe the differences between...                                      | Find and explain the differences                                                                                               |
| Elucidate               | Make clear and explain                                                  | Clearly explain what something means                                                                                           |
| Enumerate               | List all the possible items ... count, specify, mention one by one...   | Find and present specific items                                                                                                |
| Evaluate                | Judge the value of...                                                   | Find and consider the evidence; the advantages and disadvantages, and reach a conclusion                                       |
| Evidence                | Establish facts for...                                                  | Find the 'for' evidence and explain why this supports the existing argument or situation                                       |
| Examine                 | Scrutinise thoroughly                                                   | Look closely at all key points; discuss and give your opinion                                                                  |

| <b>Key Asking Words</b> | <b>What it means</b>                                       | <b>What you need to do next</b>                                                                                   |
|-------------------------|------------------------------------------------------------|-------------------------------------------------------------------------------------------------------------------|
| Explain                 | Illustrate by comments; make clear; say 'why'              | Look for reasons to support your explanation                                                                      |
| Explore                 | Examine and discuss in detail                              | Look at the theory, detail the positives, negatives and any differences by using examples to argue your viewpoint |
| Express                 | Distinctly state; make known                               | Consider the main viewpoint and other authors' viewpoints; state your own view and support with evidence          |
| Formulate               | State or devise...                                         | Concisely and methodically present information or arguments                                                       |
| Generate                | Create or suggest new ideas or interpretations of...       | Detail your starting point and give step by step developments to create new ideas                                 |
| Give account of         | Describe in detail                                         | Look for the key features                                                                                         |
| How far...?             | Evaluate to what extent or degree. Say what the limits are | Find evidence to support different viewpoints                                                                     |
| Identify                | Highlight, single out, name                                | Look for the key features                                                                                         |
| Illustrate              | Explain clearly through use of examples                    | Look for the examples that make the point clear                                                                   |
| Indicate                | Point out or show...                                       | Find the key features                                                                                             |
| Interpret               | Explain in your own words; say what this means for...      | Define your terms of reference                                                                                    |
| Judge                   | Form an opinion; conclude                                  | Look for evidence to support your judgement                                                                       |
| Justify                 | Prove a viewpoint or action                                | Find evidence to validly support your argument                                                                    |
| List                    | Provide an item-by-item record of...                       | Look for key points and record one after the other                                                                |
| Narrate                 | Tell what happened                                         | Recount something in your own words                                                                               |
| Outline                 | Give a general plan of...                                  | Find the important details, leave out minor details and show how they are interrelated                            |

| Key Asking Words   | What it means                                                                                              | What you need to do next                                                                                                                                                                           |
|--------------------|------------------------------------------------------------------------------------------------------------|----------------------------------------------------------------------------------------------------------------------------------------------------------------------------------------------------|
| Predict            | To state, tell about, or make known in advance, especially on the basis of specific knowledge              | Identify and present key features that provide possible solutions                                                                                                                                  |
| Prove              | Establish the validity of...                                                                               | Find indisputable evidence as support                                                                                                                                                              |
| Reflect            | Contemplate, think about something in relation to existing theories, models or practice                    | Identify what's being considered, look at it from different perspectives, interpret what it means to your existing practice, theories or models and how it can influence your learning or practice |
| Refute             | Show inaccuracy of argument or statement                                                                   | Find evidence to disprove argument or statement                                                                                                                                                    |
| Relate             | Show the connection between...                                                                             | Identify the different features to show how things are alike and affect each other                                                                                                                 |
| Review             | Examine and evaluate something                                                                             | Find evidence to support your point of view                                                                                                                                                        |
| State              | Give account of...                                                                                         | Look for main points and present clearly and concisely                                                                                                                                             |
| Suggest            | Give possible reasons for...                                                                               | Report on a situation, introduce new ways to improve it and support with evidence                                                                                                                  |
| Summarise          | Give brief and concise account of...                                                                       | Find main points and bring these together clearly and concisely                                                                                                                                    |
| To what extent...? | Assess the degree of something; say what the limits are                                                    | Find evidence to support your point of view                                                                                                                                                        |
| Trace              | Show the development or progress of ... from beginning to end                                              | Find the beginning and end of ... and stages in between                                                                                                                                            |
| Verify             | Confirm or establish the truth or accuracy of a point of view with supporting evidence, examples and facts | Find evidence to support your arguments                                                                                                                                                            |
